# Supplementary material for: Brief communication: Glacier run-off estimation using altimetry-derived basin volume change: case study at Humboldt Glacier, northwest Greenland
Source: Copernicus journal article supplement (doi:10.5194/tc-15-1005-2021), 2021-02-25
Supplement: Supplementary file 1 [file tc-15-1005-2021-supplement.zip]

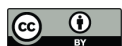

## *Supplement of*

# **Brief communication: Glacier run-off estimation using altimetry-derived basin volume change: case study at Humboldt Glacier, northwest Greenland**

**Laurence Gray**

*Correspondence to:* Laurence Gray ([laurence.gray@uottawa.ca](mailto:laurence.gray@uottawa.ca))

- [tc-15-1005-2021-supplement-title-page.pdf](#)
- [Supplementary Images.docx](#)
- [im1.png](#)
- [im10.png](#)
- [im11.png](#)
- [im12.png](#)
- [im13.png](#)
- [im14.png](#)
- [im15.png](#)
- [im2.png](#)
- [im3.png](#)
- [im4.png](#)
- [im5.png](#)
- [im6.png](#)
- [im7.png](#)
- [im8.png](#)
- [im9.png](#)

The copyright of individual parts of the supplement might differ from the CC BY 4.0 License.
